# Supplementary material for: The added value of flavouring extracts from Calabrian chili peppers by-products: characterization of bioactive and volatile compounds comparing green extraction techniques
Source: Research Square preprint supplement (doi:10.21203/rs.3.rs-6549793/v1), 2025-05-14
Supplement: Supplementary file 1 [file 56300b24663fa3e7d0938065.xlsx]

## Sheet: Table 1
Table 1. Results of the extraction yields, spectrophotometric assays, capsaicinoids and bioactive compounds of the different DEs from Soxhlet extraction. The lowercase letters in the results indicate a ANOVA statistical significant difference, among DEs obtained using the same solvent but different matrix/solvent ratios.
Solventà	EtOH100	EtOH100	EtOH100	EtOH70	EtOH70	EtOH70	EtOH50	EtOH50	EtOH50
matrix/solvent ratio (g/mL)à	0.04	0.02	0.01	0.04	0.02	0.01	0.04	0.02	0.01
Extraction yield (g/100 g)	16.96 ± 0.73	17.86 ± 1.07	18.86 ± 0.88	23.07 ± 1.70b	28.53 ± 0.42a	28.53 ± 1.67a	27.58 ± 2.06	25.92 ± 1.63	27.67 ± 1.53
TPC (mg GAE/g)	43.77 ± 2.43	41.31 ± 3.98	50.04 ± 9.45	34.46 ± 3.88	39.79 ± 1.52	34.57 ± 3.43	34.03 ± 1.34	32.85 ± 2.31	32.17 ± 1.68
TFC (mg RE/g)	285.84 ± 20.45	310.28 ± 8.81	282.92 ± 7.69	211.70 ± 41.10	196.84 ± 25.91	181.07 ± 25.63	104.40 ± 18.21	104.85 ± 18.90	108.47 ± 20.08
DPPH (mg TE/g)	6.29 ± 0.36a	4.65 ± 0.84b	6.23 ± 0.47a	8.34 ± 1.16	6.90 ± 1.09	8.39 ± 0.52	8.63 ± 0.48	8.77 ± 1.69	7.68 ± 0.18
TCC (µg/g)	3783.67 ± 534.19	3310.54 ± 644.19	2984.52 ± 87.62	1160.68 ± 49.28b	1964.19 ± 136.52a	2068.00 ± 28.21a	1128.40 ± 221.93	1288.41 ± 235.78	1278.08 ± 147.91
Vitamin C (µg/g)	948.71 ± 54.47	914.89 ± 39.82	977.59 ± 48.66	1048.83 ± 59.82b	1195.35 ± 34.53a	1101.13 ± 6.83b	1116.11 ± 3.11	1153.56 ± 46.51	1160.52 ± 52.25
Capsaicin (µg/g)	6249.58 ± 142.15	6484.62 ± 676.02	5900.97 ± 275.99	3254.60 ± 169.84	3437.12 ± 57.19	2965.47 ± 589.27	3467.31 ± 137.61	3267.72 ± 424.81	2553.54 ± 367.41
Dihydrocapsaicin (µg/g)	3200.79 ± 24.83	3718.42 ± 504.67	2982.54 ± 101.49	1702.70 ± 105.27	1732.48 ± 41.81	1454.90 ± 289.15	1729.40 ± 46.35	1568.18 ± 469.42	1195.65 ± 301.09
Alpha-tocopherol (µg/g)	1398.86 ± 106.76	1642.38 ± 86.08	1737.25 ± 154.57	895.94 ± 5.33	854.83 ± 152.58	951.92 ± 86.88	838.07 ± 25.28	780.22 ± 103.70	705.02 ± 45.46
Gallic acid (µg/g)	9.87 ± 0.61a	6.83 ± 0.28c	8.00 ± 0.41b	9.14 ± 0.20a	9.07 ± 0.69a	7.73 ± 0.28b	8.38 ± 0.06	8.08 ± 0.30	8.46 ± 0.58
Neochlorogenic acid (µg/g)	17.33 ± 0.70	16.49 ± 0.28	18.27 ± 0.88	18.59 ± 0.20a	18.39 ± 0.33a	17.90 ± 0.08b	17.94 ± 0.04	17.86 ± 0.37	18.19 ± 0.45
Chlorogenic acid (µg/g)	32.53 ± 2.69a	14.59 ± 2.81b	31.98 ± 4.30a	29.95 ± 1.16b	34.72 ± 2.07a	26.34 ± 1.85c	25.46 ± 0.60	25.21 ± 2.11	26.92 ± 4.72
4-Hydroxy benzoic acid (µg/g)	178.10 ± 8.41a	137.69 ± 8.24b	152.47 ± 9.77b	117.87 ± 1.03b	148.60 ± 10.86a	128.89 ± 1.48b	136.88 ± 2.61	141.74 ± 6.45	144.98 ± 6.35
Caffeic acid (µg/g)	62.79 ± 2.40	61.59 ± 1.98	66.89 ± 3.07	58.80 ± 0.02c	69.65 ± 2.11a	64.42 ± 2.13b	65.19 ± 2.10	65.33 ± 1.86	68.72 ± 3.56
Vanillic acid (µg/g)	228.46 ± 5.69b	225.98 ± 4.18b	256.18 ± 10.95a	212.90 ± 0.35c	231.29 ± 3.77a	220.15 ± 3.70b	220.86 ± 2.58	224.92 ± 3.50	219.80 ± 2.75
P-Coumaric acid (µg/g)	55.30 ± 5.96	43.84 ± 5.78	59.91 ± 8.98	29.80 ± 1.13c	58.17 ± 7.16a	40.80 ± 0.99b	43.71 ± 4.03	53.49 ± 4.08	57.26 ± 4.16
Ferulic acid (µg/g)	116.20 ± 4.86	108.72 ± 5.38	121.91 ± 6.11	90.09 ± 2.00b	115.04 ± 5.89a	95.05 ± 4.36b	100.14 ± 1.40	109.89 ± 6.77	109.65 ± 6.02
Phloridzin (µg/g)	6.34 ± 0.94a	3.43 ± 0.3b	4.21 ± 0.37b	2.99 ± 0.06b	4.83 ± 0.72a	3.42 ± 0.23b	3.63 ± 0.42	4.36 ± 0.59	4.44 ± 0.34
Kaempferol-3-glucoside (µg/g)	80.86 ± 11.29a	45.54 ± 10.41b	46.80 ± 10.97b	39.39 ± 0.83b	70.16 ± 14.64a	54.28 ± 6.59ab	61.53 ±11.10	74.36 ± 16.37	83.09 ± 17.97
Hesperidin (µg/g)	n.d.	n.d.	n.d.	n.d.	n.d.	n.d.	n.d.	n.d.	12.35 ± 1.30

## Sheet: Table 2
Table 2. Volatile compounds detected in Soxhlet extracts by HS-SPME-GC-MS and related odor descriptors. Values are reported as average area % ± standard deviation for each solvent and matrix/solvent ratio. n.d.: not detected
					matrix/solvent ration (g/mL)	0.04	0.02	0.01	0.04	0.02	0.01	0.04	0.02	0.01
	Compounds name	Odour descriptions	RI	RI Lit	Dry matrix	EtOH100	EtOH100	EtOH100	EtOH70	EtOH70	EtOH70	EtOH50	EtOH50	EtOH50
ACIDS	benzoic acid	faint	1168	1178	n.d.	n.d.	n.d.	n.d.	0.65 ± 0.06	0.62 ± 0.06	0.532 ± 0.001	0.40 ± 0.04	0.52 ± 0.04	0.51 ± 0.05
	nonanoic acid	cheese	1265	1272	0.56 ± 0.10	n.d.	n.d.	n.d.	0.99 ± 0.06	0.33 ± 0.06	0.83 ± 0.07	1.05 ± 0.20	0.85 ± 0.10	0.86 ± 0.08
	6-octenoic acid,3,7-dimethyl (citronellic acid)	fresh green, weedy, somewhat grassy	1310	1312	n.d.	0.45 ± 0.01	0.36 ± 0.07	n.d.	0.65 ± 0.11	0.50 ± 0.02	0.44 ± 0.08	n.d.	n.d.	0.36 ± 0.07
	n-decanoic acid	rancid, fatty	1359	1368	n.d.	n.d.	n.d.	n.d.	1.49 ± 0.20	n.d.	n.d.	n.d.	n.d.	1.33 ± 0.08
	octanoic acid	fatty, fruity	1175	1178	n.d.	n.d.	n.d.	n.d.	n.d.	0.24 ± 0.02	0.32 ± 0.06	0.53 ± 0.10	0.33 ± 0.06	0.28 ± 0.04
	hexanoic acid	fatty, cheesy, waxy	994	981	1.38 ± 0.26	n.d.	n.d.	n.d.	n.d.	n.d.	n.d.	n.d.	0.71 ± 0.12	n.d.
	butanoic acid,2-methyl	pungent cheesy	860	859	0.488 ± 0.002	n.d.	n.d.	n.d.	n.d.	n.d.	n.d.	n.d.	n.d.	n.d.
	SUM				2.43 ± 0.36	0.45 ± 0.01	0.36 ± 0.07	n.d.	3.78 ± 0.43	1.69 ± 0.16	2.12 ± 0.21	1.98 ± 0.34	2.41 ± 0.32	3.34 ± 0.32
KETONES	2-pentanone,4-hydroxy-4-methyl	faint, minty	841	847	n.d.	n.d.	n.d.	n.d.	1.22 ± 0.08	n.d.	n.d.	n.d.	n.d.	n.d.
	ethanone, 1-(1H-pyrrol-2-yl)	popcorn-like note, bread	1058	1059	1.58 ± 0.24	0.98 ± 0.13	0.62 ± 0.09	0.50 ± 0.02	2.84 ± 0.39	1.47 ± 0.09	1.53 ± 0.01	1.89 ± 0.08	1.13 ± 0.16	0.91 ± 0.09
	5,9-undecadien-2-one,6,10-dimethyl (E)	floral	1441	1442	2.12 ± 0.18	0.49 ± 0.05	0.37 ± 0.01	0.29 ± 0.01	0.72 ± 0.06	0.39 ± 0.04	n.d.	n.d.	n.d.	n.d.
	trans-beta-ionone	floral and woody	1472	1469	4.91 ± 0.03	0.90 ± 0.06	0.61 ± 0.03	0.40 ± 0.02	1.44 ± 0.19	0.79 ± 0.02	0.42 ± 0.08	0.89 ± 0.07	n.d.	n.d.
	ethanone 1-(2-furanyl)-	sweet, balsamic, almond, cocoa, caramel-like, coffee	919	925	0.62 ± 0.11	n.d.	n.d.	n.d.	n.d.	n.d.	n.d.	n.d.	n.d.	n.d.
	3,5-octadien-2-one	fruity, green, grassy	1089	1081	0.87 ± 0.03	n.d.	n.d.	n.d.	n.d.	n.d.	n.d.	n.d.	n.d.	n.d.
	3,5-octadien-2-one (E,E)	pungent, herbaceous	1088	1098	0.48 ± 0.05	n.d.	n.d.	n.d.	n.d.	n.d.	n.d.	n.d.	n.d.	n.d.
	2,6,6-trimethyl-2-cyclohexene-1,4-dione	woody, musty sweet	1136	1142	0.260 ± 0.005	n.d.	n.d.	n.d.	n.d.	n.d.	n.d.	n.d.	n.d.	n.d.
	ethanone, 1-(4-methylphenyl)	strong fruity-floral, warm, sweet	1176	1183	0.189 ± 0.002	n.d.	n.d.	n.d.	n.d.	n.d.	n.d.	n.d.	n.d.	n.d.
	SUM				11.03 ± 0.65	2.37 ± 0.24	1.60 ± 0.13	1.19 ± 0.05	1.44 ± 0.19	2.65 ± 0.15	1.95 ± 0.09	2.78 ± 0.15	1.13 ± 0.16	0.91 ± 0.09
ALDEHYDES	benzeneacetaldehyde	powerful, penetrating, pungent, green, floral and sweet	1038	1043	n.d.	n.d.	n.d.	n.d.	1.10 ± 0.09	0.86 ± 0.04	n.d.	0.69 ± 0.11	0.71 ± 0.10	n.d.
	vanillin	intensely sweet and very tenacious, creamy, vanilla	1383	1394	n.d.	n.d.	n.d.	n.d.	0.19 ± 0.03	0.12 ± 0.02	n.d.	n.d.	0.13 ± 0.02	0.15 ± 0.02
	nonanal	citrus, fatty	1100	1100	n.d.	n.d.	n.d.	n.d.	n.d.	n.d.	n.d.	n.d.	0.45 ± 0.06	0.34 ± 0.04
	decanal	citrus	1199	1200	n.d.	n.d.	n.d.	n.d.	n.d.	n.d.	n.d.	n.d.	0.17 ± 0.03	n.d.
	2,4-decadienal (E,E)	fatty, buttery, orange	1305	1314	n.d.	0.17 ± 0.03	0.32 ± 0.04	0.29 ± 0.05	n.d.	n.d.	n.d.	n.d.	n.d.	n.d.
	safranal	spicy saffron-like note with herbaceous, tabacco facets, floral undertones	1193	1201	1.30 ± 0.10	n.d.	n.d.	n.d.	n.d.	n.d.	n.d.	n.d.	n.d.	n.d.
	hexanal	green, grassy, sharp, waxy, unripened fruit, leafy	801	800	0.83 ± 0.15	n.d.	n.d.	n.d.	n.d.	n.d.	n.d.	n.d.	n.d.	n.d.
	benzaldehyde	sharp, sweet bitter-almond, cherry, aromatic, spicy	956	961	0.66 ± 0.09	n.d.	n.d.	n.d.	n.d.	n.d.	n.d.	n.d.	n.d.	n.d.
	SUM				3.10 ± 0.38	0.17 ± 0.03	0.32 ± 0.04	0.29 ± 0.05	1.29 ± 0.12	0.98 ± 0.06	n.d.	0.69 ± 0.11	1.46 ± 0.21	0.49 ± 0.06
MONOTERPENE HYDROCARBONS	Isoterpinolene		1083	1087	0.47 ± 0.07	n.d.	n.d.	n.d.	n.d.	n.d.	n.d.	n.d.	n.d.	n.d.
	D-limonene	citrusy, fruity, orange, berry, fresh	1022	1030	1.08 ± 0.12	n.d.	n.d.	n.d.	n.d.	n.d.	0.19 ± 0.03	n.d.	n.d.	n.d.
	alpha-phellandrene	black pepper, fresh, citrus, with a discrete mint note	1000	1007	1.03 ± 0.19	n.d.	n.d.	n.d.	n.d.	n.d.	n.d.	n.d.	n.d.	n.d.
	p-cymene	lemon, woody, mild	1003	992	4.26 ± 0.73	n.d.	n.d.	n.d.	n.d.	n.d.	n.d.	n.d.	n.d.	n.d.
	SUM				6.84 ± 1.11	n.d.	n.d.	n.d.	n.d.	n.d.	0.19 ± 0.03	n.d.	n.d.	n.d.
OXYGENATED MONOTERPENES	eucalyptol	fresh, camphor, eucalyptus, pine, mint, herbal	1027	1038	0.89 ± 0.16	n.d.	n.d.	n.d.	n.d.	n.d.	n.d.	n.d.	n.d.	n.d.
	thymol	fresh, rosemary, herbal, thyme	1283	1292	0.72 ± 0.13	n.d.	n.d.	n.d.	n.d.	0.54 ± 0.07	0.70 ± 0.13	n.d.	0.81 ± 0.10	2.14 ± 0.32
	dihydroactinidiolide	fruity, tea, musky or coumarin-like	1512	1522	7.58 ± 1.45	3.26 ± 0.29	2.11 ± 0.35	1.77 ± 0.05	7.45 ± 0.60	4.73 ± 0.21	5.12 ± 0.19	8.28 ± 1.08	5.39 ± 0.53	4.42 ± 0.19
	cyclohexanemethanol,alpha,alpha,4-trimethyl		1172	1162	n.d.	n.d.	n.d.	n.d.	n.d.	1.89 ± 0.10	n.d.	n.d.	19.40 ± 0.41	33.77 ± 0.58
	beta-cyclocitral	tropical, saffron, herbal, clean, rose, sweet, tobacco, green, fruity	1212	1214	0.678 ± 0.03	n.d.	n.d.	n.d.	n.d.	n.d.	n.d.	n.d.	n.d.	n.d.
	SUM				9.87 ± 1.77	3.26 ± 0.29	2.11 ± 0.35	1.77 ± 0.05	7.45 ± 0.60	7.16 ± 0.38	5.82 ± 0.32	8.28 ± 1.08	25.60 ± 1.04	40.15 ±1.09
SESQUITERPENE HYDROCARBONS	gamma-himachalene		1467	1468	0.64 ± 0.11	n.d.	n.d.	n.d.	n.d.	n.d.	n.d.	n.d.	n.d.	n.d.
	alpha-curcumene	earthy, slightly acrid, spicy	1471	1479	2.01 ± 0.33	0.46 ± 0.02	0.30 ± 0.03	0.25 ± 0.01	0.26 ± 0.03	0.19 ± 0.01	n.d.	n.d.	n.d.	n.d.
	SUM				2.65 ± 0.44	0.46 ± 0.02	0.30 ± 0.03	0.25 ± 0.01	0.26 ± 0.03	0.19 ± 0.01	n.d.	n.d.	n.d.	n.d.
OXYGENATED SESQUITERPENES	alpha-ionone	iris, violet, warm-woody, faint balsamic-floral, freesia, strawberry	1415	1421	0.618 ± 0.004	0.09 ± 0.02	0.05 ± 0.01	0.04 ± 0.01	n.d.	n.d.	n.d.	n.d.	n.d.	n.d.
ESTERS	6-octenoic acid, 3,7-dimethyl, methyl ester (methyl citronellate)	floral, geranium and waxy, winey and fruity nuances	1265	1262	1.19 ± 0.02	n.d.	n.d.	n.d.	n.d.	n.d.	n.d.	n.d.	n.d.	n.d.
	octanoic acid,methyl ester (caprylic acid, methyl ester)	waxy	1122	1128	0.12 ± 0.02	n.d.	n.d.	n.d.	n.d.	n.d.	n.d.	n.d.	n.d.	n.d.
	decanoic acid,methyl ester	fermented type odour, oily, nutty or rum-like	1318	1326	0.19 ± 0.02	n.d.	n.d.	n.d.	n.d.	n.d.	n.d.	n.d.	n.d.	n.d.
	tetradecanoic acid, 12-methyl-methyl ester	honey and orris	1780	1771	0.27 ± 0.03	0.18 ± 0.02	0.14 ± 0.02	n.d.	0.64 ± 0.08	0.36 ± 0.04	n.d.	0.43 ± 0.06	0.48 ± 0.07	0.28 ± 0.02
	pentadecanoic acid, methyl ester	fruity	1827	1824	n.d.	n.d.	n.d.	n.d.	0.11 ± 0.02	n.d.	n.d.	n.d.	n.d.	n.d.
	9-hexadecenoic acid, methyl ester (Z) (methyl palmitoleate)	faint	1902	1911	n.d.	0.07 ± 0.01	0.022 ± 0.004	0.040 ± 0.01	0.33 ± 0.06	0.08 ± 0.01	n.d.	0.19 ± 0.03	0.22 ± 0.03	0.11 ± 0.01
	hexadecanoic acid, methyl ester	fatty oil, orris	1928	1928	3.23 ± 0.58	1.45 ± 0.21	0.82 ± 0.09	0.63 ± 0.05	5.78 ± 0.37	2.13 ± 0.05	2.18 ± 0.14	6.15 ± 0.94	3.91 ± 0.18	3.52 ± 0.29
	9,12-octadecadienoic acid, methyl ester (Z,Z) (methyl linoleate)	oily, fatty, woody	2093	2092	n.d.	0.21 ± 0.04	0.12 ± 0.02	0.09 ± 0.01	1.26 ± 0.19	0.28 ± 0.03	0.199 ± 0.003	0.48 ± 0.09	0.92 ± 0.14	0.86 ± 0.07
	9-octadecenoic acid (Z), methyl ester (methyl oleate)	faint, fatty	2092	2103	n.d.	0.16 ± 0.03	0.09 ± 0.01	0.047 ± 0.002	1.01 ± 0.16	0.22 ± 0.04	0.154 ± 0.003	0.42 ± 0.08	0.83 ± 0.06	0.66 ± 0.08
	methyl tetradecanoate (methyl myristate)	honey, orris, faint onion	1717	1726	n.d.	1.20 ± 0.14	0.68 ± 0.11	0.57 ± 0.01	3.96 ± 0.24	1.65 ± 0.07	1.63 ± 0.06	2.52 ± 0.30	2.37 ± 0.30	1.19 ± 0.10
	methyl 13-methyltetradecanoate	honey, orris	1789	1779	3.10 ± 0.13	n.d.	n.d.	n.d.	n.d.	n.d.	n.d.	n.d.	n.d.	n.d.
	methyl salicylate	caramel, peppermint	1186	1197	1.99 ± 0.14	n.d.	n.d.	n.d.	n.d.	n.d.	n.d.	n.d.	n.d.	n.d.
	methyl-8-methyl-nonanoate		1280	1289	0.78 ± 0.07	n.d.	n.d.	n.d.	n.d.	n.d.	n.d.	n.d.	n.d.	n.d.
	SUM				10.87 ± 1.01	3.27 ± 0.45	1.87 ± 0.25	1.38 ± 0.08	13.09 ± 1.12	2.67 ± 0.24	4.17 ± 0.21	10.19 ± 1.5	8.73 ± 0.78	6.62 ± 0.57
ALKANES	tetradecane	from gasoline-like to odorless	1389	1400	1.20 ± 0.17	2.49 ± 0.13	2.59 ± 0.11	3.23 ± 0.13	0.76 ± 0.11	0.72 ± 0.08	1.62 ± 0.29	n.d.	1.85 ± 0.08	1.42 ± 0.18
	tetradecane,2-methyl		1452	1461	10.44 ± 0.68	1.98 ± 0.07	1.20 ± 0.07	0.53 ± 0.10	n.d.	n.d.	n.d.	n.d.	n.d.	n.d.
	pentadecane	waxy	1488	1500	3.50 ± 0.28	0.55 ± 0.03	0.32 ± 0.03	0.22 ± 0.01	0.38 ± 0.03	0.20 ± 0.01	n.d.	n.d.	n.d.	n.d.
	2-methylpentadecane		1552	1561	4.120 ± 0.001	1.06 ± 0.07	0.64 ± 0.09	0.48 ± 0.02	1.50 ± 0.20	0.80 ± 0.04	n.d.	n.d.	n.d.	n.d.
	pentadecane,3-methyl		1559	1570	3.47 ± 0.67	n.d.	n.d.	n.d.	0.29 ± 0.04	n.d.	n.d.	n.d.	n.d.	n.d.
	hexadecane		1589	1600	3.68 ± 0.02	2.18 ± 0.03	1.87 ± 0.29	2.52 ± 0.13	3.04 ± 0.24	2.67 ± 0.09	2.49 ± 0.35	0.77 ± 0.12	0.89 ± 0.14	1.14 ± 0.06
	2-methylhexadecane		1653	1665	2.98 ± 0.31	0.76 ± 0.05	0.46 ± 0.08	0.30 ± 0.02	1.57 ± 0.20	0.78 ± 0.01	0.588 ± 0.001	0.82 ± 0.09	0.42 ± 0.07	n.d.
	heptadecane	odourless	1691	1700	4.70 ± 0.24	1.26 ± 0.09	0.69 ± 0.11	0.57 ± 0.06	2.86 ± 0.25	1.44 ± 0.03	1.27 ± 0.03	1.68 ± 0.01	0.94 ± 0.13	0.61 ± 0.10
	octadecane	odourless	1793	1800	0.44 ± 0.05	0.33 ± 0.01	0.27 ± 0.05	0.37 ± 0.02	0.89 ± 0.13	0.64 ± 0.01	0.64 ± 0.01	0.56 ± 0.08	0.41 ± 0.03	0.34 ± 0.05
	nonadecane	fuel-like, bland	1793	1900	0.18 ± 0.03	0.065 ± 0.004	0.03 ± 0.01	0.024 ± 0.002	0.21 ± 0.03	0.095 ± 0.001	0.095 ± 0.001	n.d.	0.11 ± 0.01	0.06 ± 0.01
	pentadecane,2,6,10,14-tetramethyl		1697	1703	0.98 ± 0.19	0.21 ± 0.03	0.10 ± 0.01	n.d.	n.d.	0.26 ± 0.01	n.d.	n.d.	n.d.	n.d.
	dodecane		1193	1200	n.d.	0.97 ± 0.11	0.64 ± 0.08	0.61 ± 0.04	n.d.	n.d.	1.95 ± 0.35	n.d.	1.56 ± 0.19	0.96 ± 0.15
	decane		997	1000	n.d.	0.07 ± 0.01	0.13 ± 0.02	0.16 ± 0.02	n.d.	n.d.	n.d.	n.d.	n.d.	n.d.
	tridecane,2-methyl		1353	1364	6.50 ± 0.74	0.77 ± 0.08	0.44 ± 0.03	0.34 ± 0.06	n.d.	n.d.	n.d.	n.d.	n.d.	n.d.
	tridecane		1291	1300	0.45 ± 0.03	n.d.	n.d.	n.d.	n.d.	n.d.	n.d.	n.d.	n.d.	n.d.
	SUM				42.64 ± 3.41	12.70 ± 0.71	9.38 ± 0.98	9.35 ± 0.61	11.5 ± 1.23	7.61 ± 0.28	8.65 ± 1.03	3.83 ± 0.30	6.18 ± 0.65	4.53 ± 0.55
ALKENES	1-tetradecene	mild	1381	1391	0.14 ± 0.02	31.98 ± 0.27	33.00 ± 2.42	35.62 ± 0.44	9.26 ± 0.49	10.05 ± 0.64	1.14 ± 0.13	5.00 ± 0.69	1.05 ± 0.14	6.76 ± 1.20
	5-tetradecene		1371	1388	n.d.	n.d.	0.16 ± 0.01	0.33 ± 0.05	0.25 ± 0.03	n.d.	n.d.	n.d.	n.d.	n.d.
	2-methyl-1-tetradecene		1435	1445	6.80 ± 0.45	0.99 ± 0.04	0.568 ± 0.003	0.41 ± 0.06	0.36 ± 0.03	n.d.	n.d.	n.d.	n.d.	n.d.
	1-hexadecene		1582	1587	n.d.	24.31 ± 0.65	25.21 ± 4.47	31.52 ± 0.51	16.09 ± 0.98	39.31 ± 1.21	34.58 ± 0.49	26.19 ± 3.53	11.07 ± 0.13	13.99 ± 2.21
	7-hexadecene		1589	1588	n.d.	0.52 ± 0.05	0.61 ± 0.12	0.96 ± 0.03	0.73 ± 0.06	0.90 ± 0.05	0.83 ± 0.01	n.d.	0.16 ± 0.01	n.d.
	3-hexadecene		1593	1588	n.d.	0.35 ± 0.01	0.36 ± 0.06	0.33 ± 0.05	0.55 ± 0.06	0.54 ± 0.01	0.4 ± 0.07	n.d.	n.d.	n.d.
	1-octadecene	mild gasoline-like	1787	1788	n.d.	4.85 ± 0.11	5.00 ± 0.98	7.05 ± 0.07	11.01 ± 0.31	11.39 ± 0.16	17.38 ± 1.23	8.31 ± 0.77	6.36 ± 0.27	6.52 ± 0.52
	7-hexadecene (Z)		1578	1587	n.d.	n.d.	0.18 ± 0.03	0.35 ± 0.04	n.d.	0.43 ± 0.01	n.d.	n.d.	n.d.	n.d.
	7-tetradecene		1390	1396	n.d.	0.84 ± 0.01	0.76 ± 0.11	1.25 ± 0.10	n.d.	1.51 ± 0.28	n.d.	n.d.	n.d.	n.d.
	1-dodecene	mild	1185	1187	n.d.	6.53 ± 1.02	6.81 ± 1.30	3.27 ± 0.15	n.d.	n.d.	n.d.	n.d.	n.d.	n.d.
	2-dodecene (Z)		1197	1213	n.d.	0.18 ± 0.03	0.22 ± 0.04	0.14 ± 0.02	n.d.	n.d.	n.d.	n.d.	n.d.	n.d.
	2-butyl-1-decene		1339	1348	n.d.	0.64 ± 0.09	0.72 ± 0.06	0.83 ± 0.12	n.d.	n.d.	n.d.	n.d.	n.d.	n.d.
	3-tetradecene		1402	1404	n.d.	0.43 ± 0.04	0.51 ± 0.01	0.67 ± 0.01	n.d.	n.d.	n.d.	n.d.	n.d.	n.d.
	SUM				6.94 ± 0.47	71.62 ± 2.32	74.11 ± 9.61	82.73 ± 1.65	38.25 ± 1.96	64.13 ± 2.36	54.33 ± 1.93	39.5 ± 4.99	18.64 ± 0.55	27.27 ± 3.93
ALCOHOLS	benzyl alcohol	floral, damp, wet	1030	1034	n.d.	0.22 ± 0.04	0.35 ± 0.05	0.20 ± 0.02	0.70 ± 0.06	0.43 ± 0.03	0.46 ± 0.09	0.91 ± 0.16	0.333 ± 0.002	n.d.
	n-heptadecanol-1		1976	1986	n.d.	0.42 ± 0.05	0.42 ± 0.04	0.60 ± 0.03	1.25 ± 0.20	0.90 ± 0.03	1.36 ± 0.08	n.d.	n.d.	1.16 ± 0.11
	diacetone alcohol	odourless	838	847	n.d.	n.d.	n.d.	n.d.	n.d.	2.18 ± 0.41	3.63 ± 0.69	24.17 ± 1.54	10.38 ± 0.71	7.12 ± 0.82
	ethanol,2-phenoxy	faint rose-like	1211	1221	n.d.	0.13 ± 0.02	0.14 ± 0.02	n.d.	n.d.	0.49 ± 0.05	0.53 ± 0.10	n.d.	n.d.	n.d.
	1-phenoxypropan-2-ol		1236	1246	n.d.	0.41 ± 0.08	n.d.	n.d.	n.d.	n.d.	n.d.	n.d.	n.d.	n.d.
	1-octanol,2-butyl		1280	1277	n.d.	n.d.	0.42 ± 0.08	0.41 ± 0.04	n.d.	n.d.	n.d.	n.d.	n.d.	n.d.
	1-pentanol,4-methyl	nutty notes	838.354	838	0.29 ± 0.03	n.d.	n.d.	n.d.	n.d.	n.d.	n.d.	n.d.	n.d.	n.d.
	1-hexanol	delicate fatty-fruity, woody	870	867	0.26 ± 0.05	n.d.	n.d.	n.d.	n.d.	n.d.	n.d.	n.d.	n.d.	n.d.
	SUM				0.55 ± 0.08	1.37 ± 0.21	1.44 ± 0.20	1.21 ± 0.09	1.95 ± 0.26	4.00 ± 0.52	5.98 ± 0.96	25.08 ± 1.7	10.71 ± 0.71	8.28 ± 0.93
HETEROCYCLES	2-pyrrolidinone,1-methyl	mild, fish	1029	1034	n.d.	1.77 ± 0.31	1.29 ± 0.22	0.68 ± 0.10	1.91 ± 0.12	1.38 ± 0.06	1.90 ± 0.07	2.68 ± 0.50	0.73 ± 0.05	1.80 ± 0.12
	maltol	caramellic type notes	1104	1110	n.d.	n.d.	n.d.	n.d.	0.39 ± 0.05	0.33 ± 0.03	0.42 ± 0.02	n.d.	0.26 ± 0.05	0.37 ± 0.05
	pyranone	malt, toasted, fruity	1139	1149	n.d.	1.84 ± 0.10	1.14 ± 0.07	0.84 ± 0.09	4.15 ± 0.17	2.16 ± 0.15	3.11 ± 0.12	2.24 ± 0.30	2.03 ± 0.09	1.45 ± 0.24
	pyrrolidine,1-acetyl	mild, fish	1138	1128	n.d.	n.d.	n.d.	n.d.	n.d.	n.d.	n.d.	n.d.	0.37 ± 0.02	0.41 ± 0.04
	1-pyrrolidinecarboxaldehyde		1076	1081	n.d.	n.d.	n.d.	n.d.	n.d.	n.d.	0.58 ± 0.09	n.d.	0.30 ± 0.04	n.d.
	ethylmethylmaleimide		1224	1234	n.d.	n.d.	n.d.	n.d.	n.d.	n.d.	n.d.	n.d.	0.09 ± 0.02	n.d.
	caprolactam	mild, disagreeable	1235	1244	n.d.	n.d.	n.d.	n.d.	n.d.	n.d.	n.d.	n.d.	n.d.	0.45 ± 0.08
	furan, 2-pentyl	green bean, metallic, vegetable notes	990	996	0.44 ± 0.08	n.d.	n.d.	n.d.	n.d.	n.d.	n.d.	n.d.	n.d.	n.d.
	SUM				0.44 ± 0.08	3.61 ± 0.41	2.43 ± 0.29	1.52 ± 0.19	6.45 ± 0.34	3.87 ± 0.24	6.01 ± 0.30	4.92 ± 0.8	3.78 ± 0.27	4.48 ± 0.49
PHENOLS	vanillyl ethyl ether	chocolate	1455	1466	n.d.	n.d.	n.d.	n.d.	2.84 ± 0.15	2.00 ± 0.15	2.32 ± 0.19	2.47 ± 0.32	2.06 ± 0.11	2.46 ± 0.13
PHENYLPROPANES	1,3-di tert-butylbenzene		1250	1257	n.d.	n.d.	n.d.	n.d.	n.d.	n.d.	0.82 ± 0.15	n.d.	0.18 ± 0.01	n.d.
	TOTAL				98.07 ± 7.42	99.37 ± 4.71	93.97 ± 11.96	99.70± 2.79	88.3 ±6.43	96.95 ±4.55	92.36 ±5.42	99.72 ± 11.29	80.89 ± 4.81	98.47 ± 8.16

## Sheet: Table 3
Table 3. Volatile compounds detected in different extraction methods by HS-SPME/GC-MS and related odour descriptions. Values are reported as raplicates average area % ± standard deviation for each different extraction method. n.d.: not detected. RI:retention index; RI lit:retention index from literature.
						Sohxlet			UAE			SFE
	Compounds name	Odour descriptions	RI	RI Lit	Dry Matrix	EtOH100	EtOH70	EtOH50	EtOH100	EtOH70	EtOH50	EtOH100	EtOH70	EtOH50
ACIDS	benzoic acid	faint	1168	1178	n.d.*	n.d.	0.65 ± 0.06	0.40 ± 0.04	n.d.	0.54 ± 0.04	n.d.	6.5±1.11	5.78±1.10	n.d.
	nonanoic acid	cheese	1265	1272	0.56 ± 0.10	n.d.	0.99 ± 0.06	1.05 ± 0.20	n.d.	0.82 ± 0.01	n.d.	n.d.	n.d.	1.57±0.31
	6-octenoic acid,3,7-dimethyl (citronellic acid)	fresh green, weedy, somewhat grassy	1310	1312	n.d.	0.45 ± 0.01	0.65 ± 0.11	n.d.	n.d.	n.d.	n.d.	n.d.	n.d.	n.d.
	n-decanoic acid	rancid, fatty	1359	1368	n.d.	n.d.	1.49 ± 0.20	n.d.	n.d.	n.d.	n.d.	n.d.	n.d.	n.d.
	octanoic acid	fatty, fruity	1175	1178	n.d.	n.d.	n.d.	0.53 ± 0.10	n.d.	0.30 ± 0.04	n.d.	0.61±0.08	0.62±0.13	0.59±0.07
	hexanoic acid	fatty, cheesy, waxy	994	981	1.38 ± 0.26	n.d.	n.d.	n.d.	n.d.	n.d.	n.d.	n.d.	2.84±0.76	0.99±0.15
	butanoic acid,2-methyl	pungent cheesy	860	859	0.49 ± 0.002	n.d.	n.d.	n.d.	n.d.	n.d.	n.d.	n.d.	0.22±0.05	n.d.
	SUM				2.43 ± 0.36	0.45 ± 0.01	3.78 ± 0.43	1.98 ± 0.34	n.d.	1.66 ± 0.09	n.d.	7.12±1.19	9.46±2.04	3.15±0.59
KETONES	2-pentanone,4-hydroxy-4-methyl	faint, minty	841	847	n.d.	n.d.	1.22 ± 0.08	n.d.	n.d.	n.d.	n.d.	n.d.	1.90±0.36	4.96±0.76
	ethanone, 1-(1H-pyrrol-2-yl)	popcorn-like note, bread	1058	1059	1.58 ± 0.24	0.98 ± 0.13	2.84 ± 0.39	1.89 ± 0.08	0.27 ± 0.01	1.15 ± 0.2	n.d.	0.85±0.01	2.22±0.50	0.57±0.11
	5,9-undecadien-2-one,6,10-dimethyl (E)	floral	1441	1442	2.12 ± 0.18	0.49 ± 0.05	0.72 ± 0.06	n.d.	0.29 ± 0.05	0.58 ± 0.03	n.d.	2.51±0.02	n.d.	n.d.
	trans-beta-ionone	floral and woody	1472	1469	4.91 ± 0.03	0.90 ± 0.06	1.44 ± 0.19	0.89 ± 0.07	0.32 ± 0.06	0.98 ± 0.18	n.d.	4.03±0.06	5.77±0.52	6.73±0.69
	ethanone 1-(2-furanyl)-	sweet, balsamic, almond, cocoa, caramel-like, coffee	919	925	0.62 ± 0.11	n.d.	n.d.	n.d.	n.d.	n.d.	n.d.	n.d.	n.d.	n.d.
	3,5-octadien-2-one	fruity, green, grassy	1089	1081	0.87 ± 0.03	n.d.	n.d.	n.d.	n.d.	n.d.	n.d.	n.d.	n.d.	n.d.
	3,5-octadien-2-one (E,E)	pungent, herbaceous	1088	1098	0.48 ± 0.05	n.d.	n.d.	n.d.	n.d.	n.d.	n.d.	n.d.	n.d.	n.d.
	2,6,6-trimethyl-2-cyclohexene-1,4-dione	woody, musty sweet	1136	1142	0.26 ± 0.005	n.d.	n.d.	n.d.	n.d.	n.d.	n.d.	0.07±0.01	n.d.	n.d.
	ethanone, 1-(4-methylphenyl)	strong fruity-floral, warm, sweet	1176	1183	0.19 ± 0.002	n.d.	n.d.	n.d.	n.d.	n.d.	n.d.	n.d.	n.d.	n.d.
	2-butanone,4-(2,6,6-trimethyl-1-cyclohexen-1-yl)	floral	1425	1433	n.d.	n.d.	n.d.	n.d.	n.d.	n.d.	n.d.	0.41±0.02	0.55±0.13	n.d.
	SUM				11.46 ± 0.68	2.37 ± 0.24	1.44 ± 0.19	2.78 ± 0.15	0.88 ± 0.12	2.71 ± 0.41	n.d.	7.84±0.21	10.44±1.51	12.26±1.56
ALDEHYDES	benzaldehyde,2,5-dimethyl	almond-like	1205	1208	n.d.	n.d.	n.d.	n.d.	n.d.	0.57 ± 0.10	n.d.	n.d.	n.d.	n.d.
	benzeneacetaldehyde	powerful, penetrating, pungent, green, floral and sweet	1038	1043	n.d.	n.d.	1.10 ± 0.09	0.69 ± 0.11	n.d.	n.d.	0.22 ± 0.03	1.55±0.35	1.46±0.36	0.99±0.16
	vanillin	intensely sweet and very tenacious, creamy, vanilla	1383	1394	n.d.	n.d.	0.19 ± 0.03	n.d.	n.d.	0.15 ± 0.01	n.d.	n.d.	n.d.	n.d.
	pentadecanal	fresh, waxy	1706	1707	n.d.	n.d.	n.d.	n.d.	n.d.	0.34 ± 0.06	3.27 ± 0.47	n.d.	n.d.	n.d.
	nonanal	citrus, fatty	1100	1100	n.d.	n.d.	n.d.	n.d.	n.d.	n.d.	2.32 ± 0.43	n.d.	3.68±0.56	0.72±0.12
	decanal	citrus	1199	1200	n.d.	n.d.	n.d.	n.d.	n.d.	n.d.	0.73 ± 0.08	1.41±0.07	1.32±0.18	0.75±0.15
	2,4-decadienal (E,E)	fatty, buttery, orange	1305	1314	n.d.	0.17 ± 0.03	n.d.	n.d.	n.d.	n.d.	n.d.	n.d.	n.d.	n.d.
	safranal	spicy saffron-like note with herbaceous, tabacco facets, floral undertones	1193	1201	1.30 ± 0.10	n.d.	n.d.	n.d.	n.d.	n.d.	0.20 ± 0.03	0.80±0.23	0.33±0.04	n.d.
	hexanal	green, grassy, sharp, waxy, unripened fruit, leafy	801	800	0.83 ± 0.15	n.d.	n.d.	n.d.	n.d.	n.d.	n.d.	1.10±0.14	0.32±0.05	0.05±0.06
	benzaldehyde	sharp, sweet bitter-almond, cherry, aromatic, spicy	956	961	0.66 ± 0.09	n.d.	n.d.	n.d.	n.d.	n.d.	n.d.	0.46±0.07	1.94±0.39	0.93±0.25
	2-nonenal	fatty and herbaceous	1153	1159	n.d.	n.d.	n.d.	n.d.	n.d.	n.d.	n.d.	1.88±0.24	0.73±0.13	0.62±0.13
	dodecanal	waxy, floreal	1397	1407	n.d.	n.d.	n.d.	n.d.	n.d.	n.d.	n.d.	n.d.	n.d.	0.27±0.05
	SUM				2.79 ± 0.34	0.17 ± 0.03	1.29 ± 0.12	0.69 ± 0.11	n.d.	1.06 ± 0.17	6.74 ± 1.04	7.20±1.10	9.78±1.71	4.33±0.92
MONOTERPENE HYDROCARBONS	Isoterpinolene		1083	1087	0.47 ± 0.07	n.d.	n.d.	n.d.	n.d.	n.d.	n.d.	n.d.	n.d.	n.d.
	D-limonene	citrusy, fruity, orange, berry, fresh	1022	1030	1.08 ± 0.12	n.d.	n.d.	n.d.	n.d.	n.d.	n.d.	n.d.	n.d.	n.d.
	alpha-phellandrene	black pepper, fresh, citrus, with a discrete mint note	1000	1007	1.03 ± 0.19	n.d.	n.d.	n.d.	n.d.	n.d.	n.d.	n.d.	n.d.	n.d.
	p-cymene	lemon, woody, mild	1003	992	4.26 ± 0.73	n.d.	n.d.	n.d.	n.d.	n.d.	n.d.	n.d.	n.d.	n.d.
	SUM				6.84 ± 1.11	n.d.	n.d.	n.d.	n.d.	n.d.	n.d.	n.d.	n.d.	n.d.
OXYGENATED MONOTERPENES	eucalyptol	fresh, camphor, eucalyptus, pine, mint, herbal	1027	1038	0.89 ± 0.16	n.d.	n.d.	n.d.	n.d.	n.d.	n.d.	n.d.	n.d.	n.d.
	linalool	floral, spicy wood, lavender, jasmine, laurel, faintly citrusy note	1095	1104	n.d.	n.d.	n.d.	n.d.	n.d.	n.d.	0.34 ± 0.03	0.50±0.10	1.45±0.18	1.27±0.09
	alpha-terpineol	fresh sweet lilac, floral, woody undertones	1182	1190	n.d.	n.d.	n.d.	n.d.	n.d.	n.d.	0.15 ± 0.03	1.22±0.27	1.14±0.07	1.27±0.35
	1-hydroxy-p-menth-3-one		1322	1324	n.d.	n.d.	n.d.	n.d.	n.d.	3.04 ± 0.10	n.d.	n.d.	n.d.	n.d.
	thymol	fresh, rosemary, herbal, thyme	1283	1292	0.72 ± 0.13	n.d.	n.d.	n.d.	0.46 ± 0.06	0.74 ± 0.13	1.75 ± 0.24	0.45±0.11	0.46±0.04	0.39±0.05
	dihydroactinidiolide	fruity, tea, musky or coumarin-like	1512	1522	7.58 ± 1.45	3.26 ± 0.29	7.45 ± 0.60	8.28 ± 1.08	1.46 ± 0.16	8.50 ± 0.44	4.10 ± 0.79	n.d.	n.d.	n.d.
	beta-cyclocitral	tropical, saffron, herbal, clean, rose, sweet, tobacco, green, fruity	1212	1214	0.68 ± 0.03	n.d.	n.d.	n.d.	n.d.	n.d.	n.d.	n.d.	n.d.	n.d.
	SUM				9.87 ± 1.77	3.26 ± 0.29	7.45 ± 0.60	8.28 ± 1.08	1.92 ± 0.22	12.28 ± 0.67	6.34 ± 1.09	2.17± 0.48	3.05± 0.29	2.93± 0.49
SESQUITERPENE HYDROCARBONS	caryophyllene	sweet, woody, spicy, clove, dry	1405	1398	n.d.	n.d.	n.d.	n.d.	n.d.	n.d.	n.d.	0.22±0.06	n.d.	0.63±0.14
	gamma-himachalene		1467	1468	0.64 ± 0.11	n.d.	n.d.	n.d.	n.d.	n.d.	n.d.	n.d.	n.d.	n.d.
	alpha-curcumene	earthy, slightly acrid, spicy	1471	1479	2.01 ± 0.33	0.46 ± 0.02	0.26 ± 0.03	n.d.	n.d.	0.23 ± 0.02	0.21 ± 0.03	0.89±0.14	0.92±0.23	1.06±0.14
	SUM				2.65 ± 0.44	0.46 ± 0.02	0.26 ± 0.03	n.d.	n.d.	0.23 ± 0.02	0.21 ± 0.03	1.11±0.20	0.92±0.23	1.69±0.28
OXYGENATED SESQUITERPENES	alpha-ionone	iris, violet, warm-woody, faint balsamic-floral, freesia, strawberry	1415	1421	0.62 ± 0.004	0.09 ± 0.02	n.d.	n.d.	n.d.	n.d.	n.d.	0.56±0.11	0.66±0.17	0.60±0.14
ESTERS	6-octenoic acid, 3,7-dimethyl, methyl ester (methyl citronellate)	floral, geranium and waxy, winey and fruity nuances	1265	1262	1.19 ± 0.02	n.d.	n.d.	n.d.	n.d.	n.d.	n.d.	n.d.	n.d.	n.d.
	octanoic acid,methyl ester (caprylic acid, methyl ester)	waxy	1122	1128	0.12 ± 0.02	n.d.	n.d.	n.d.	n.d.	n.d.	n.d.	n.d.	n.d.	n.d.
	decanoic acid,methyl ester	fermented type odour, oily, nutty or rum-like	1318	1326	0.19 ± 0.02	n.d.	n.d.	n.d.	n.d.	n.d.	n.d.	n.d.	n.d.	n.d.
	tetradecanoic acid, 12-methyl-methyl ester	honey and orris	1780	1771	0.27 ± 0.03	0.18 ± 0.02	0.64 ± 0.08	0.43 ± 0.06	n.d.	n.d.	n.d.	n.d.	n.d.	n.d.
	pentadecanoic acid, methyl ester	fruity	1827	1824	n.d.	n.d.	0.11 ± 0.02	n.d.	n.d.	n.d.	n.d.	n.d.	n.d.	n.d.
	9-hexadecenoic acid, methyl ester (Z) (methyl palmitoleate)	faint	1902	1911	n.d.	0.07 ± 0.01	0.33 ± 0.06	0.19 ± 0.03	n.d.	0.52 ± 0.02	n.d.	n.d.	n.d.	n.d.
	hexadecanoic acid, methyl ester	fatty oil, orris	1928	1928	3.23 ± 0.58	1.45 ± 0.21	5.78 ± 0.37	6.15 ± 0.94	n.d.	n.d.	n.d.	0.24±0.04	1.46±0.12	0.79±0.05
	9,12-octadecadienoic acid, methyl ester (Z,Z) (methyl linoleate)	oily, fatty, woody	2093	2092	n.d.	0.21 ± 0.04	1.26 ± 0.19	0.48 ± 0.09	0.09 ± 0.01	2.21 ± 0.07	n.d.	n.d.	n.d.	n.d.
	9-octadecenoic acid (Z), methyl ester (methyl oleate)	faint, fatty	2092	2103	n.d.	0.16 ± 0.03	1.01 ± 0.16	0.42 ± 0.08	0.066 ± 0.004	1.77 ± 0.02	n.d.	n.d.	n.d.	n.d.
	ethanol,2-(2-butoxyethoxy) acetate	mild	1359	1366	n.d.	n.d.	n.d.	n.d.	n.d.	0.39 ± 0.05	n.d.	n.d.	n.d.	n.d.
	methyl tetradecanoate (methyl myristate)	honey, orris, faint onion	1717	1726	n.d.	1.20 ± 0.14	3.96 ± 0.24	2.52 ± 0.30	0.51 ± 0.04	5.39 ± 0.12	3.24 ± 0.62	1.72±0.03	1.92±0.16	1.61±0.32
	methyl 13-methyltetradecanoate	honey, orris	1789	1779	3.10 ± 0.13	n.d.	n.d.	n.d.	0.11 ± 0.01	0.97 ± 0.06	n.d.	n.d.	n.d.	n.d.
	methyl palmitate	fatty oil, orris	1927	1927	n.d.	n.d.	n.d.	n.d.	0.57 ± 0.05	9.50 ± 0.32	4.58 ± 0.75	n.d.	n.d.	n.d.
	methyl salicylate	caramel, peppermint	1186	1197	1.99 ± 0.14	n.d.	n.d.	n.d.	n.d.	n.d.	n.d.	n.d.	n.d.	n.d.
	methyl-8-methyl-nonanoate		1280	1289	0.78 ± 0.07	n.d.	n.d.	n.d.	n.d.	n.d.	n.d.	0.49±0.15	n.d.	n.d.
	dodecanoic acid methyl ester	waxy, soapy, creamy, coconut, with mushroom nuances	1513	1525	n.d.	n.d.	n.d.	n.d.	n.d.	n.d.	n.d.	1.20±0.02	0.83±0.09	1.23±0.27
	dodecanoic acid, ethyl ester	mild, fatty, slightly fruity-floral	1584	1593	n.d.	n.d.	n.d.	n.d.	n.d.	n.d.	n.d.	n.d.	0.29±0.01	0.44±0.09
	tetradecanoic acid ethyl ester	sweet, waxy, violet, orris	1789	1793	n.d.	n.d.	n.d.	n.d.	n.d.	n.d.	n.d.	n.d.	n.d.	0.23±0.03
	SUM				10.87 ± 1.01	3.27 ± 0.45	13.09 ± 1.12	10.19 ± 1.5	1.35 ± 0.11	20.75 ± 0.66	7.82 ± 1.37	3.65±0.24	4.50±0.38	4.3±0.76
ALKANES	nonane,4,5-dimethyl		1052	1042	n.d.	n.d.	n.d.	n.d.	n.d.	0.68 ± 0.12	0.33 ± 0.06	n.d.	n.d.	n.d.
	undecane,5,7-dimethyl		1151	1156	n.d.	n.d.	n.d.	n.d.	0.10 ± 0.02	0.35 ± 0.05	n.d.	n.d.	n.d.	n.d.
	undecane,2,6-dimethyl		1207	1214	n.d.	n.d.	n.d.	n.d.	n.d.	0.28 ± 0.01	n.d.	n.d.	0.23±0.05	n.d.
	undecane-4-ethyl		1252	1242	n.d.	n.d.	n.d.	n.d.	n.d.	0.66 ± 0.11	0.35 ± 0.04	n.d.	n.d.	n.d.
	dodecane,2,6,11-trimethyl		1270	1275	n.d.	n.d.	n.d.	n.d.	n.d.	1.45 ± 0.27	1.10 ± 0.20	n.d.	n.d.	n.d.
	dodecane,4,6-dimethyl		1315	1325	n.d.	n.d.	n.d.	n.d.	n.d.	0.23 ± 0.04	n.d.	n.d.	n.d.	n.d.
	tetradecane	from gasoline-like to odorless	1389	1400	1.20 ± 0.17	2.49 ± 0.13	0.76 ± 0.11	n.d.	3.08 ± 0.09	2.14 ± 0.39	2.81 ± 0.19	n.d.	6.96±0.93	3.80±0.85
	tetradecane,2-methyl		1452	1461	10.44 ± 0.68	1.98 ± 0.07	n.d.	n.d.	0.56 ± 0.02	1.04 ± 0.17	1.71 ± 0.07	5.15±0.41	8.17±1.37	8.37±1.38
	pentadecane	waxy	1488	1500	3.50 ± 0.28	0.55 ± 0.03	0.38 ± 0.03	n.d.	0.21 ± 0.02	0.53 ± 0.10	0.88 ± 0.06	2.42±0.46	4.26±0.83	3.36±0.66
	2-methylpentadecane		1552	1561	4.12 ± 0.001	1.06 ± 0.07	1.50 ± 0.20	n.d.	0.42 ± 0.04	0.83 ± 0.15	1.00 ± 0.12	n.d.	3.55±0.08	3.81±0.89
	pentadecane,3-methyl		1559	1570	3.47 ± 0.67	n.d.	0.29 ± 0.04	n.d.	n.d.	n.d.	n.d.	0.65±0.02	0.77±0.01	n.d.
	hexadecane		1589	1600	3.68 ± 0.02	2.18 ± 0.03	3.04 ± 0.24	0.77 ± 0.12	2.03 ± 0.07	2.50 ± 0.45	2.63 ± 0.28	n.d.	2.26±0.05	4.20±1.18
	2-methylhexadecane		1653	1665	2.98 ± 0.31	0.76 ± 0.05	1.57 ± 0.20	0.82 ± 0.09	0.25 ± 0.02	n.d.	1.03 ± 0.18	n.d.	n.d.	2.89±0.81
	heptadecane	odourless	1691	1700	4.70 ± 0.24	1.26 ± 0.09	2.86 ± 0.25	1.68 ± 0.01	0.43 ± 0.04	2.94 ± 0.24	2.88 ± 0.34	2.68±0.05	2.92±0.13	4.83±0.27
	octadecane	odourless	1793	1800	0.44 ± 0.05	0.33 ± 0.01	0.89 ± 0.13	0.56 ± 0.08	0.31 ± 0.01	0.78 ± 0.03	0.55 ± 0.06	n.d.	n.d.	n.d.
	nonadecane	fuel-like, bland	1793	1900	0.18 ± 0.03	0.065 ± 0.004	0.21 ± 0.03	n.d.	0.0200 ± 0.0025	0.21 ± 0.04	n.d.	n.d.	n.d.	n.d.
	pentadecane,2,6,10,14-tetramethyl		1697	1703	0.98 ± 0.19	0.21 ± 0.03	n.d.	n.d.	n.d.	0.53 ± 0.04	0.56 ± 0.09	0.48±0.01	0.51±0.01	0.25±0.05
	dodecane		1193	1200	n.d.	0.97 ± 0.11	n.d.	n.d.	1.15 ± 0.13	2.22 ± 0.08	1.46 ± 0.24	5.27±0.52	3.82±0.69	3.00±0.26
	decane		997	1000	n.d.	0.07 ± 0.01	n.d.	n.d.	0.24 ± 0.01	0.58 ± 0.11	n.d.	1.13±0.10	1.42±0.28	1.51±0.20
	tridecane,2-methyl		1353	1364	6.50 ± 0.74	0.77 ± 0.08	n.d.	n.d.	n.d.	n.d.	n.d.	3.30±0.58	n.d.	1.02±0.21
	tridecane		1291	1300	0.45 ± 0.03	n.d.	n.d.	n.d.	n.d.	n.d.	n.d.	2.16±0.63	1.06±0.15	n.d.
	SUM				42.64 ± 3.41	12.70 ± 0.71	11.5 ± 1.23	3.83 ± 0.30	8.8 ± 0.45	18.13 ± 2.42	17.29 ± 1.93	23.24±2.78	35.93±4.58	37.04±6.76
ALKENES	1-tetradecene	mild	1381	1391	0.14 ± 0.02	31.98 ± 0.27	9.26 ± 0.49	5.00 ± 0.69	35.76 ± 0.40	3.66 ± 0.24	19.59 ± 2.42	n.d.	n.d.	n.d.
	5-tetradecene		1371	1388	n.d.	n.d.	0.25 ± 0.03	n.d.	n.d.	n.d.	n.d.	n.d.	n.d.	n.d.
	2-methyl-1-tetradecene		1435	1445	6.80 ± 0.45	0.99 ± 0.04	0.36 ± 0.03	n.d.	0.29 ± 0.02	n.d.	0.63 ± 0.10	3.36±0.81	3.82±0.55	4.01±0.50
	1-hexadecene		1582	1587	n.d.	24.31 ± 0.65	16.09 ± 0.98	26.19 ± 3.53	28.66 ± 0.06	21.98 ± 0.20	23.59 ± 0.98	n.d.	n.d.	n.d.
	7-hexadecene		1589	1588	n.d.	0.52 ± 0.05	0.73 ± 0.06	n.d.	0.72 ± 0.07	0.38 ± 0.03	n.d.	n.d.	n.d.	n.d.
	3-hexadecene		1593	1588	n.d.	0.35 ± 0.01	0.55 ± 0.06	n.d.	0.426 ± 0.004	0.37 ± 0.01	1.09 ± 0.16	n.d.	n.d.	n.d.
	1-octadecene	mild gasoline-like	1787	1788	n.d.	4.85 ± 0.11	11.01 ± 0.31	8.31 ± 0.77	6.28 ± 0.13	8.95 ± 0.24	5.70 ± 0.63	n.d.	n.d.	n.d.
	E-7-octadecene		1792	1782	n.d.	n.d.	n.d.	n.d.	0.061 ± 0.003	n.d.	n.d.	n.d.	n.d.	n.d.
	1-pentadecene,2-methyl		1570	1581	n.d.	n.d.	n.d.	n.d.	0.128 ± 0.003	n.d.	n.d.	n.d.	n.d.	n.d.
	7-hexadecene (Z)		1578	1587	n.d.	n.d.	n.d.	n.d.	n.d.	n.d.	n.d.	n.d.	n.d.	0.30±0.04
	7-tetradecene		1390	1396	n.d.	0.84 ± 0.01	n.d.	n.d.	1.0735 ± 0.0005	n.d.	n.d.	n.d.	n.d.	n.d.
	1-dodecene	mild	1185	1187	n.d.	6.53 ± 1.02	n.d.	n.d.	8.20 ± 0.88	n.d.	2.93 ± 0.12	n.d.	n.d.	8.58±0.69
	2-dodecene (E)		1192	1205	n.d.	n.d.	n.d.	n.d.	0.30 ± 0.03	n.d.	n.d.	n.d.	n.d.	n.d.
	2-dodecene (Z)		1197	1213	n.d.	0.18 ± 0.03	n.d.	n.d.	0.16 ± 0.02	n.d.	n.d.	n.d.	n.d.	n.d.
	1-tridecene	mild	1288	1294	n.d.	n.d.	n.d.	n.d.	0.30 ± 0.02	n.d.	n.d.	n.d.	n.d.	n.d.
	2-butyl-1-decene		1339	1348	n.d.	0.64 ± 0.09	n.d.	n.d.	0.846 ± 0.002	n.d.	n.d.	n.d.	n.d.	n.d.
	3-tetradecene		1402	1404	n.d.	0.43 ± 0.04	n.d.	n.d.	0.577 ± 0.005	n.d.	n.d.	n.d.	n.d.	n.d.
	4-tetradecene		1394	1387	n.d.	n.d.	n.d.	n.d.	n.d.	n.d.	0.99 ± 0.19	n.d.	n.d.	n.d.
	SUM				6.94 ± 0.47	71.62 ± 2.32	38.25 ± 1.96	39.5 ± 4.99	82.73 ± 1.65	35.34 ± 0.72	54.52 ± 4.6	3.36±0.81	3.82±0.55	12.89±1.23
ALCOHOLS	benzyl alcohol	floral, damp, wet	1030	1034	n.d.	0.22 ± 0.04	0.70 ± 0.06	0.91 ± 0.16	0.19 ± 0.01	n.d.	n.d.	1.79±0.02	0.85±0.21	n.d.
	n-heptadecanol-1		1976	1986	n.d.	0.42 ± 0.05	1.25 ± 0.20	n.d.	0.52 ± 0.02	0.90 ± 0.02	n.d.	n.d.	n.d.	n.d.
	diacetone alcohol	odourless	838	847	n.d.	n.d.	n.d.	24.17 ± 1.54	n.d.	n.d.	n.d.	n.d.	n.d.	n.d.
	ethanol,2-phenoxy	faint rose-like	1211	1221	n.d.	0.13 ± 0.02	n.d.	n.d.	n.d.	n.d.	n.d.	n.d.	n.d.	n.d.
	1-phenoxypropan-2-ol		1236	1246	n.d.	0.41 ± 0.08	n.d.	n.d.	n.d.	n.d.	n.d.	n.d.	n.d.	n.d.
	1-octanol,2-butyl		1280	1277	n.d.	n.d.	n.d.	n.d.	0.60 ± 0.07	n.d.	n.d.	n.d.	n.d.	n.d.
	1-pentanol,4-methyl	nutty notes	838.354	838	0.29 ± 0.03	n.d.	n.d.	n.d.	n.d.	n.d.	n.d.	n.d.	n.d.	n.d.
	phenylethyl alcohol	rose, very lasting/mild and warm, honey	1105	1114	n.d.	n.d.	n.d.	n.d.	n.d.	n.d.	n.d.	1.24±0.26	1.02±0.25	0.47±0.02
	1-hexanol,2-ethyl	citrus type notes	1028	1027	n.d.	n.d.	n.d.	n.d.	n.d.	n.d.	n.d.	n.d.	0.32±0.07	0.36±0.06
	1-hexanol	delicate fatty-fruity, woody	870	867	0.26 ± 0.05	n.d.	n.d.	n.d.	n.d.	n.d.	n.d.	n.d.	n.d.	n.d.
	SUM				0.55 ± 0.08	1.18 ± 0.19	1.95 ± 0.26	25.08 ± 1.7	1.31 ± 0.10	0.90 ± 0.02	n.d.	3.03±0.28	2.19±0.53	0.83±0.08
HETEROCYCLES	2-pyrrolidinone,1-methyl	mild, fish	1029	1034	n.d.	1.77 ± 0.31	1.91 ± 0.12	2.68 ± 0.50	0.20 ± 0.02	1.45 ± 0.18	n.d.	n.d.	n.d.	n.d.
	maltol	caramellic type notes	1104	1110	n.d.	n.d.	0.39 ± 0.05	n.d.	n.d.	n.d.	n.d.	n.d.	n.d.	n.d.
	pyranone	malt, toasted, fruity	1139	1149	n.d.	1.84 ± 0.10	4.15 ± 0.17	2.24 ± 0.30	n.d.	0.23 ± 0.03	n.d.	n.d.	n.d.	n.d.
	1-pyrrolidinecarboxaldehyde		1076	1081	n.d.	n.d.	n.d.	n.d.	n.d.	0.44 ± 0.06	n.d.	n.d.	n.d.	n.d.
	caprolactam	mild, disagreeable	1235	1244	n.d.	n.d.	n.d.	n.d.	n.d.	0.84 ± 0.05	n.d.	n.d.	n.d.	n.d.
	furan, 2-pentyl	green bean, metallic, vegetable notes	990	996	0.44 ± 0.08	n.d.	n.d.	n.d.	n.d.	n.d.	n.d.	n.d.	n.d.	n.d.
	pyridine,2,4,6-trimethyl	unpleasant	988	996	n.d.	n.d.	n.d.	n.d.	0.32 ± 0.05	n.d.	n.d.	n.d.	n.d.	n.d.
	SUM				0.44 ± 0.08	3.61 ± 0.41	6.45 ± 0.34	4.92 ± 0.8	0.52 ± 0.07	2.96 ± 0.32	n.d.	n.d.	n.d.	n.d.
PHENOLS	butylated hydroxytoluene	mild, characteristic odor	1500	1509	n.d.	n.d.	n.d.	n.d.	n.d.	n.d.	n.d.	0.60±0.15	1.39±0.17	n.d.
	vanillyl ethyl ether	chocolate	1455	1466	n.d.	n.d.	2.84 ± 0.15	2.47 ± 0.32	n.d.	n.d.	n.d.	n.d.	n.d.	n.d.
	SUM				n.d.	n.d.	2.84 ± 0.15	2.47 ± 0.32	n.d.	n.d.	n.d.	0.60±0.15	1.39±0.17	n.d.
PHENYLPROPANES	1,3-di tert-butylbenzene		1250	1257	n.d.	n.d.	n.d.	n.d.	n.d.	2.23 ± 0.35	2.36 ± 0.19	n.d.	0.96±0.26	1.48±0.10
	TOTAL				98.07 ± 7.42	99.37 ± 4.71	88.3 ±6.43	99.72 ± 11.29	97.51 ± 2.72	98.37 ± 5.85	95.28 ± 10.25	59.88±7.55	83.10±12.42	81.50±12.91
