# Supplementary material for: The added value of flavouring extracts from Calabrian chili peppers by-products: characterization of bioactive and volatile compounds comparing green extraction techniques
Source: Research Square preprint supplement (doi:10.21203/rs.3.rs-6549793/v1), 2025-05-14
Supplement: Supplementary file 2 [file 6d3681814877fb5f682af2ef.xlsx]

## Sheet: Sheet1
Table 1S. Database of analysis performed on dry extracts. Results are expressed as mean ± standard deviations. Each compound/group reports the unite of measure.
Features		SOX EtOH100	SOX EtOH70	SOX EtOH50	UAE EtOH100	UAE EtOH70	UAE EtOH50	SFE EtOH100	SFE EtOH70	SFE EtOH50
Extraction yield (g/100 g)		0.17 ± 0.01	0.23 ± 0.02	0.28 ± 0.02	0.12 ± 0.002	0.26 ± 0.01	0.26 ± 0.02	0.13 ± 0.01	0.12 ± 0.01	0.12 ± 0.01
TPC (mg GAE/g DE)		43.77 ± 2.43	34.46 ± 3.88	34.03 ± 1.34	54.26 ± 4.20	35.36 ± 0.99	35.08 ± 0.75	52.16 ± 8.66	33.92 ± 4.72	33.55 ± 2.23
TFC (mg RE/g DE)		285.84 ± 20.45	211.70 ± 41.10	104.40 ± 18.21	510.02 ± 19.70	100.22 ± 9.15	37.08 ± 7.04	558.59 ± 46.42	265.07 ± 49.49	107.13 ± 14.54
DPPH (mg TE/kg DE)		6286.85 ± 356.73	8340.14 ± 1164.71	8626.93 ± 484.13	4583.80 ± 439.45	8711.16 ± 1631.93	8657.16 ± 393.09	4330.74 ± 818.72	6175.45 ± 1018.14	4252.95 ± 431.52
TCC (µg/g)		3783.67 ± 534.19	1160.68 ± 49.28	1128.40 ± 221.93	2151.02 ± 19.85	1293.38 ± 234.41	1676.90 ± 192.22	4330.46 ± 198.54	2754.48 ± 66.70	3458.91 ± 88.68
Bioactive compounds and polyphenols (µg/g)	Vitamin C	948.71 ± 54.47	1048.83 ± 59.82	1116.11 ± 3.11	998.34 ± 52.36	1269.14 ± 17.78	1210.11 ± 44.34	n.d.	n.d.	n.d.
	Capsaicin	6249.58 ± 142.15	3254.60 ± 169.84	3467.31 ± 137.61	5406.19 ± 615.36	2885.51 ± 118.83	1914.82 ± 76.02	7609.17 ± 416.51	3369.84 ± 84.73	3086.19 ± 101.41
	Dihydrocapsaicin	3200.79 ± 24.83	1702.70 ± 105.27	1729.40 ± 46.35	2712.85 ± 214.42	1521.42 ± 176.54	982.38 ± 32.33	3839.54 ± 218.56	1711.79 ± 22.62	1505.74 ± 55.72
	Alpha-tocopherol	1398.86 ± 106.76	895.94 ± 5.33	838.07 ± 25.28	712.80 ± 37.38	613.02 ± 55.46	66.26 ± 7.11	1652.51 ± 192.07	933.88 ± 106.32	379.39 ± 7.66
	Gallic acid	9.87 ± 0.61	9.14 ± 0.20	8.38 ± 0.06	6.46 ± 0.11	7.73 ± 0.09	7.44 ± 0.03	8.79 ± 0.10	13.99 ± 2.53	10.64 ± 0.30
	Neochlorogenic acid	17.33 ± 0.70	18.59 ± 0.20	17.94 ± 0.04	16.84 ± 0.41	17.41 ± 0.24	16.23 ± 0.04	n.d.	8.02 ± 0.09	7.78 ± 0.11
	Chlorogenic acid	32.53 ± 2.69	29.95 ± 1.16	25.46 ± 0.60	12.04 ± 1.03	19.13 ± 0.32	16.38 ± 1.01	1.09 ± 0.12	22.63 ± 2.06	17.09 ± 3.24
	4-Hydroxy benzoic acid	178.10 ± 8.41	117.87 ± 1.03	136.88 ± 2.61	132.31 ± 7.32	123.05 ± 4.64	126.90 ± 2.31	224.78 ± 0.27	235.18 ± 9.10	213.91 ± 4.80
	Caffeic acid	62.79 ± 2.40	58.80 ± 0.02	65.19 ± 2.10	64.21 ± 2.54	64.56 ± 0.21	65.65 ± 1.13	110.55 ± 0.13	119.02 ± 1.29	114.59 ± 0.98
	Vanillic acid	228.46 ± 5.69	212.90 ± 0.35	220.86 ± 2.58	219.27 ± 1.77	216.79 ± 3.89	215.91 ± 0.88	549.88 ± 0.46	572.73 ± 9.60	540.74 ± 9.60
	P-Coumaric acid	55.30 ± 5.96	29.80 ± 1.13	43.71 ± 4.03	42.38 ± 4.26	33.46 ± 2.86	47.67 ± 0.62	54.90 ± 0.29	64.58 ± 7.35	44.95 ± 5.54
	Ferulic acid	116.20 ± 4.86	90.09 ± 2.00	100.14 ± 1.40	94.45 ± 4.59	85.44 ± 0.33	87.96 ± 0.27	271.81 ± 0.66	282.42 ± 5.97	257.89 ± 5.52
	Phloridizin	6.34 ± 0.94	2.99 ± 0.06	3.63 ± 0.42	3.20 ± 0.36	3.11 ± 0.17	3.13 ± 0.22	5.13 ± 0.04	6.83 ± 0.29	6.54 ± 0.71
	Kaempferol-3-glucoside	80.86 ± 11.29	39.39 ± 0.83	61.53 ±11.10	34.81 ± 7.72	44.84 ± 1.39	43.28 ± 2.32	n.d.	24.68 ± 4.16	5.52 ± 7.26
	Hesperidin	n.d.	n.d.	n.d.	11.30 ± 3.21	10.61 ± 3.56	5.22 ± 0.61	n.d.	n.d.	n.d.
